# Supplementary material for: Synergistic interaction between NiPt nanoparticles and phosphorus-doped graphene support boosts hydrogen generation from hydrazine borane
Source: Royal Society of Chemistry journal article supplement (doi:10.1039/d4nj01637h), 2024-01-01
Supplement: d4nj01637h1.pdf [file d4nj01637h1.pdf]

## Supplementary Information

### **Synergistic interaction between NiPt nanoparticles and phosphorus-doped graphene support boosts hydrogen generation from hydrazine borane**

*Junnuan Wang,<sup>ab</sup> Yubo Liu,<sup>ab</sup> Henan Shang,<sup>ab</sup> Ze Qin,<sup>ab</sup> Qiuyue Fan,<sup>\*c</sup> Dewu Yue,<sup>\*d</sup> and Sijia Li<sup>\*ab</sup>*

<sup>a</sup>Key Laboratory of Special Functional Materials for Ecological Environment and Information (Hebei University of Technology), Ministry of Education, Tianjin 300130, China

<sup>b</sup>Institute of Power Source and Ecomaterials Science, Hebei University of Technology, Tianjin 300130, China

<sup>c</sup>Fujian Provincial Key Laboratory of Welding Quality Intelligent Evaluation, Longyan University, Longyan 364012, China

<sup>d</sup>Information Technology Research Institute, Shenzhen Institute of Information Technology, Shenzhen 518172, China

E-mail: [fanqiuyue1024@163.com](mailto:fanqiuyue1024@163.com) (Q.Y. Fan), [yuedewu@sziiit.edu.cn](mailto:yuedewu@sziiit.edu.cn) (D.W. Yue),

[lisj@hebut.edu.cn](mailto:lisj@hebut.edu.cn) (S.J. Li)

## Materials

All chemicals are commercially available and can be used without further purification. Sodium borohydride ( $\text{NaBH}_4$ , Sinopharm Chemical Reagent Co., Ltd,  $\geq 96\%$ ), 1,4-dioxane ( $\text{C}_4\text{H}_8\text{O}_2$ , Shanghai Macklin Biochemical Technology Co., Ltd,  $\geq 99.0\%$ ), hydrazine hemisulfate salt ( $\text{N}_2\text{H}_4 \cdot 1/2\text{H}_2\text{SO}_4$ , Shanghai Aladdin Biochemical Technology Co., Ltd,  $\geq 98.0\%$ ), n-pentane ( $\text{C}_5\text{H}_{12}$ , Sigma-Aldrich,  $\geq 99.0\%$ ), nickel (II) chloride hexahydrate ( $\text{NiCl}_2 \cdot 6\text{H}_2\text{O}$ , Shanghai Aladdin Biochemical Technology Co., Ltd, 98%), copper (II) chloride dihydrate ( $\text{CuCl}_2 \cdot 6\text{H}_2\text{O}$ , Shanghai Aladdin Biochemical Technology Co., Ltd, 99.7%), cobalt (II) chloride hexahydrate ( $\text{CoCl}_2 \cdot 6\text{H}_2\text{O}$ , Shanghai Aladdin Biochemical Technology Co., Ltd, 99.7%), Iron (III) nitrate nonahydrate ( $\text{Fe}(\text{NO}_3)_3 \cdot 9\text{H}_2\text{O}$ , Shanghai Aladdin Biochemical Technology Co., Ltd, 98.5%), potassium tetrachloroplatinate (II) ( $\text{K}_2\text{PtCl}_4$ , Shanghai Aladdin Biochemical Technology Co., Ltd, Pt  $\geq 46.0\%$ ), graphite flake (C, Alfa Aesar, 325 mesh, 99.8%), sulfuric acid ( $\text{H}_2\text{SO}_4$ , Century Kebo Technology Development Co., Ltd, 98%), hydrochloric acid (HCl, Fuchen (Tianjin) Chemical Reagent Co., Ltd, 36~37%), phosphoric acid ( $\text{H}_3\text{PO}_4$ , Shanghai Aladdin Biochemical Technology Co., Ltd,  $\geq 85\%$ ), hydrogenperoxide ( $\text{H}_2\text{O}_2$ , Beijing Chemical Works, 30%), potassium permanganate ( $\text{KMnO}_4$ , Sinopharm Chemical Reagent Co., Ltd,  $>99.99\%$ ), potassium phosphate dibasic anhydrous ( $\text{K}_2\text{HPO}_4$ , Shanghai Aladdin Biochemical Technology Co., Ltd,  $\geq 99\%$ ) and sodium hydroxide ( $\text{NaOH}$ , Shanghai Aladdin Biochemical Technology Co., Ltd, 97%). De-ionized water with the specific resistance of  $18.25 \text{ M}\Omega \cdot \text{cm}$  is obtained by reversed osmosis followed by ion-exchange and filtration.

## Characterizations

X-ray diffraction (XRD) was performed on a Bruker D8 ADVANCE X-ray generator with Cu K $\alpha$  radiation ( $\lambda=1.54056$  Å). Transmission electron microscopy (TEM) images, high-angle annular dark field scanning transmission electron microscopy (HAADF-STEM) images, energy-dispersive X-ray spectrometry (EDX) spectrum and selected-area electron diffraction (SAED) images were obtained by a FEI Tecnai G2 F30 microscope with accelerating voltage 200 kV. TEM samples were prepared by dropping two drops of dilute suspensions on copper coated carbon grids and then dried in an Ar atmosphere. Inductively coupled plasma optical emission spectrometry (ICP-OES) measurements were performed on the United States Agilent ICPOES730 spectrometer. Raman spectra were obtained using a micro-Raman spectrometer (Renishaw) with a laser of 532 nm. The Fourier transform infrared (FTIR) spectra were recorded with Bruker V80 in the wave number range from 600 to 3300 cm<sup>-1</sup>. High-resolution X-ray photoelectron spectroscopy (XPS) spectra were acquired with an ESCALAB 250Xi (Vacuum Generators) spectrometer using Mg K $\alpha$  X-rays. UV-Vis absorption spectra were recorded on an Agilent Cary 50 spectrophotometer in the wavelength range of 210-500 nm. H<sub>2</sub>, N<sub>2</sub> and NH<sub>3</sub> were performed on GC-7900 with a thermal conductivity detector (TCD) (detection limit:  $\approx 10$  ppm). Mass spectrometry (MS) analysis of the generated gas was performed using an OmniStar GSD320 mass spectrometer, wherein Ar was chosen as the carrying gas. The Brunauer-Emmett-Teller (BET) specific surface area and pore volume of the samples were characterised by a TriStar II 3020 Version 3.02 specific surface and porosity analyser.

### **Catalytic activities**

Typically, the aqueous suspension of the as-prepared  $\text{Ni}_{0.6}\text{Pt}_{0.4}/\text{P-rGO}$  catalyst (0.1 mmol of the catalyst, 7 mL) was poured into a two-necked round-bottom flask (50 mL), which was placed in a water bath at 323 K under an ambient atmosphere. One neck of the flask was connected to a water-filled graduated gas burette to measure the volume and rate of the gas and the other neck was connected to a constant pressure funnel to introduce NaOH (10 M, 1 mL) and HB (0.5 M, 2 mL) in sequence. The catalytic reaction began when the HB aqueous solution in the funnel was added to the catalyst suspension under magnetic stirring. The evolution of gas was monitored by the position of the water in the gas burette and the corresponding time was recorded.

When testing the effect of temperature on the catalytic reaction, the water bath temperature needs to be adjusted to the target temperature.

### **Recycle stability tests**

The flask containing the  $\text{Ni}_{0.6}\text{Pt}_{0.4}/\text{P-rGO}$  catalyst was placed in a water bath at 323 K. After the completion of the previous HB-catalyzed dehydrogenation reaction, the corresponding amount of NaOH (10 M, 1 mL) and the same equivalent of HB (0.5 M, 2 mL) were added to the flask. The released gas was also monitored by a buret and the corresponding time was recorded.

### **Calculation methods**

The total turnover frequency (TOF) is calculated based on the number of moles of metal, according to the following equation:

$$\text{TOF} = \frac{n_{\text{H}_2}}{n_{\text{metal}}t} \quad (\text{S1})$$

Where  $n_{\text{metal}}$  is the mole number of active metal atoms (Ni+Pt) in the catalyst,  $n_{\text{H}_2}$  is the mole number of  $\text{H}_2$  produced,  $t$  is the total time for the entire reaction.

The relationship of the temperature and the reaction rate (full conversion) is followed Arrhenius behavior. The Arrhenius' reaction rate equation can be written as follows:

$$\ln \text{TOF} = \ln A - E_a/RT \quad (\text{S2})$$

Where  $A$  is the reaction constant.

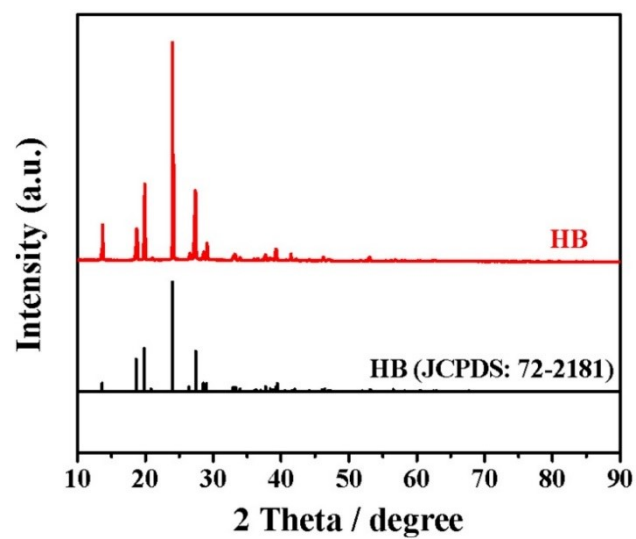

Fig. S1. XRD patterns of the prepared HB.

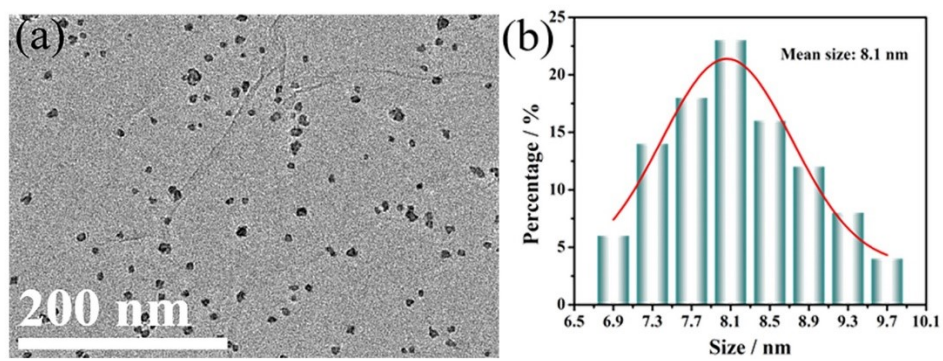

Fig. S2. (a) TEM image of  $\text{Ni}_{0.6}\text{Pt}_{0.4}/\text{rGO}$  and (b) corresponding size distribution.

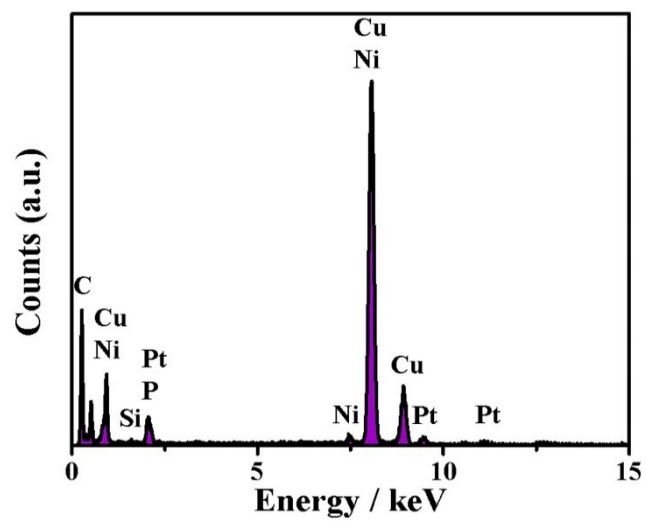

Fig. S3. EDX pattern of  $\text{Ni}_{0.6}\text{Pt}_{0.4}/\text{P-rGO}$ .



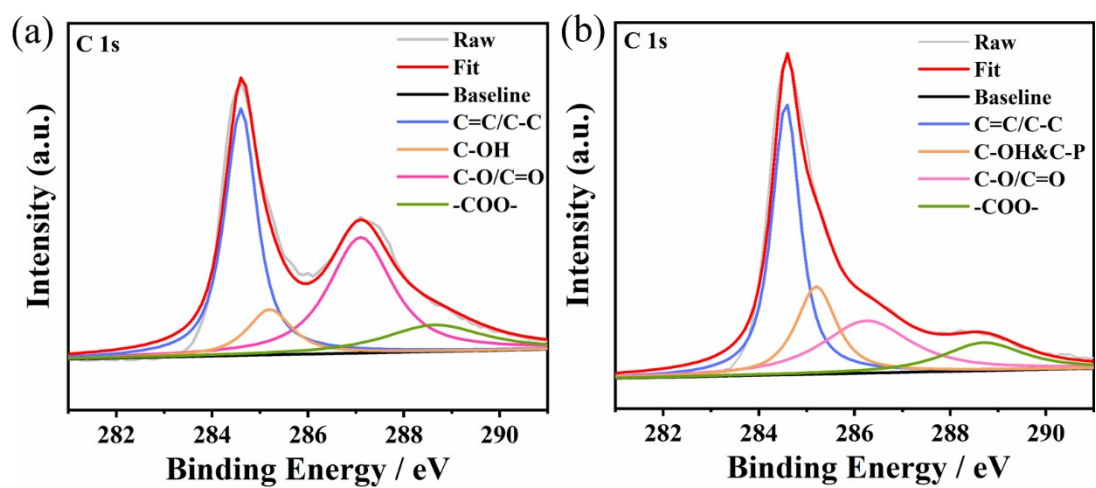

Fig. S4. High-resolution XPS spectra of C 1s in (a) GO and (b) Ni<sub>0.6</sub>Pt<sub>0.4</sub>/P-rGO.

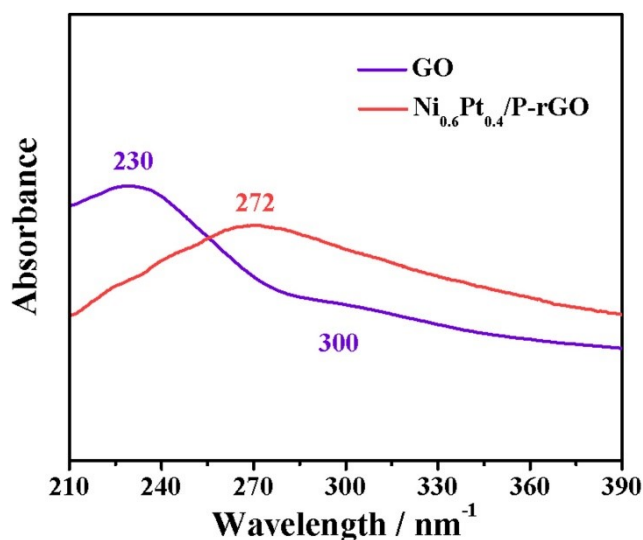

Fig. S5. The UV-Vis absorption spectra of GO and Ni<sub>0.6</sub>Pt<sub>0.4</sub>/P-rGO.

The UV-Vis absorption of GO and Ni<sub>0.6</sub>Pt<sub>0.4</sub>/P-rGO are shown in Fig. S5. A high-resolution absorption peak at 230 nm and a shoulder band at about 300 nm, which represent the  $\pi$ - $\pi^*$  transitions of aromatic C=C bands and the  $n$ - $\pi^*$  transitions of the carbonyl groups, respectively, are found in the UV-Vis absorption spectrum of GO.<sup>[S1]</sup> However, the UV-Vis absorption spectrum of the Ni<sub>0.6</sub>Pt<sub>0.4</sub>/P-rGO catalyst only shows a broad peak, which corresponds to the shift of the characteristic peak of GO at 230 nm to 272 nm, indicating that GO is successfully reduced to rGO during the preparation of the catalyst.<sup>[S2]</sup>

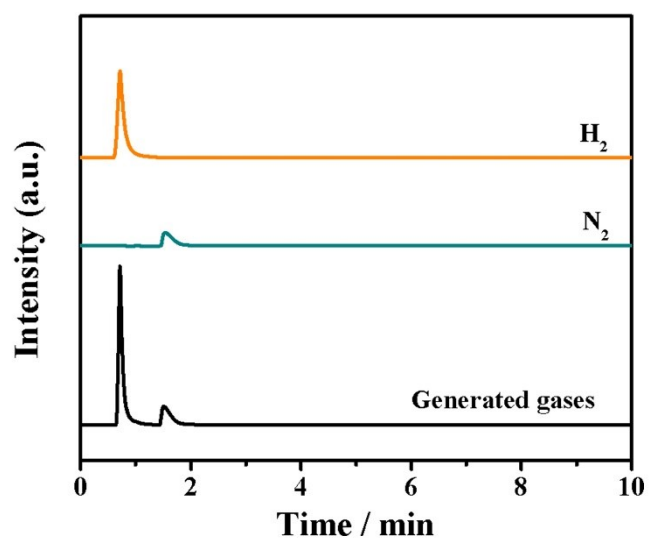

Fig. S6. TCD spectra for the generated gas from HB aqueous solution (0.5 M, 2.0 mL)

by  $Ni_{0.6}Pt_{0.4}/P-rGO$  with NaOH (10.0 M, 1.0 mL) at 323 K.

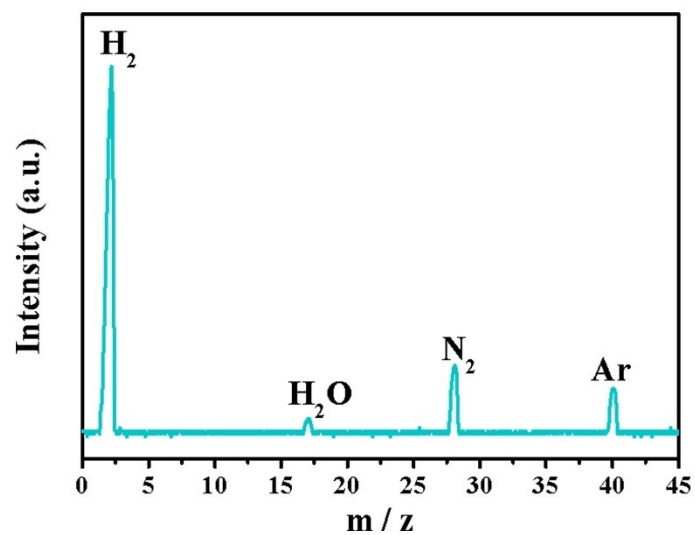

Fig. S7. MS of generated gases from the complete decomposition of HB catalyzed by  $Ni_{0.6}Pt_{0.4}/P-rGO$  in Ar atmosphere at 323 K.

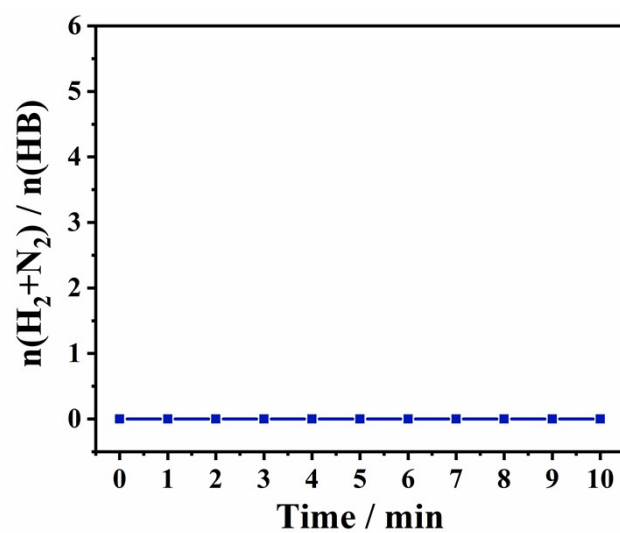

Fig. S8. Time course plots for hydrolytic dehydrogenation of HB aqueous solution (0.5 M, 2.0 mL) by pure P-rGO at 323 K.

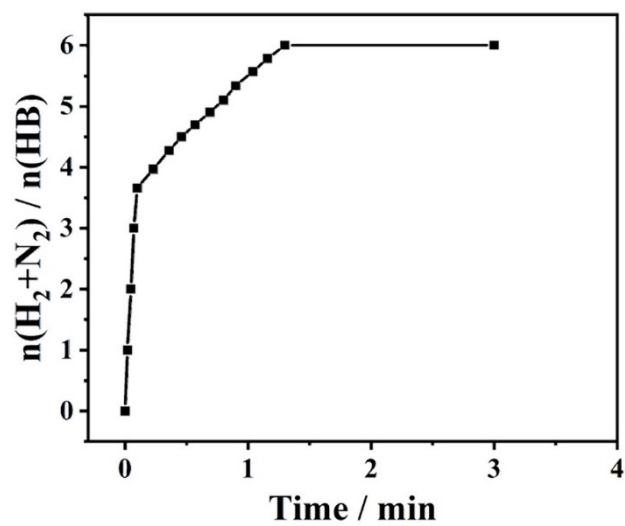

Fig. S9. Time course plots for hydrolytic dehydrogenation of HB aqueous solution (0.5 M, 2.0 mL) by  $\text{Ni}_{0.6}\text{Pt}_{0.4}/\text{P-rGO}$  at 323 K under light-free conditions.

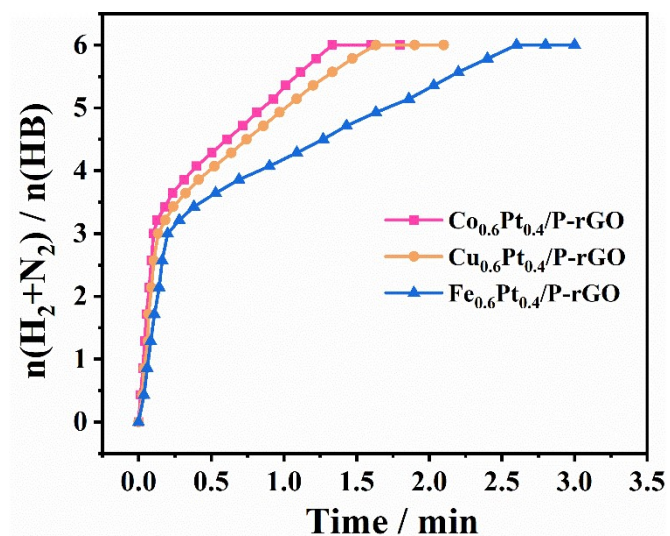

Fig. S10. Time course plots for hydrolytic dehydrogenation of HB aqueous solution (0.5 M, 2.0 mL) by  $M_{0.6}Pt_{0.4}/P-rGO$  ( $M=Fe, Co$  and  $Cu$ ) at 323 K.

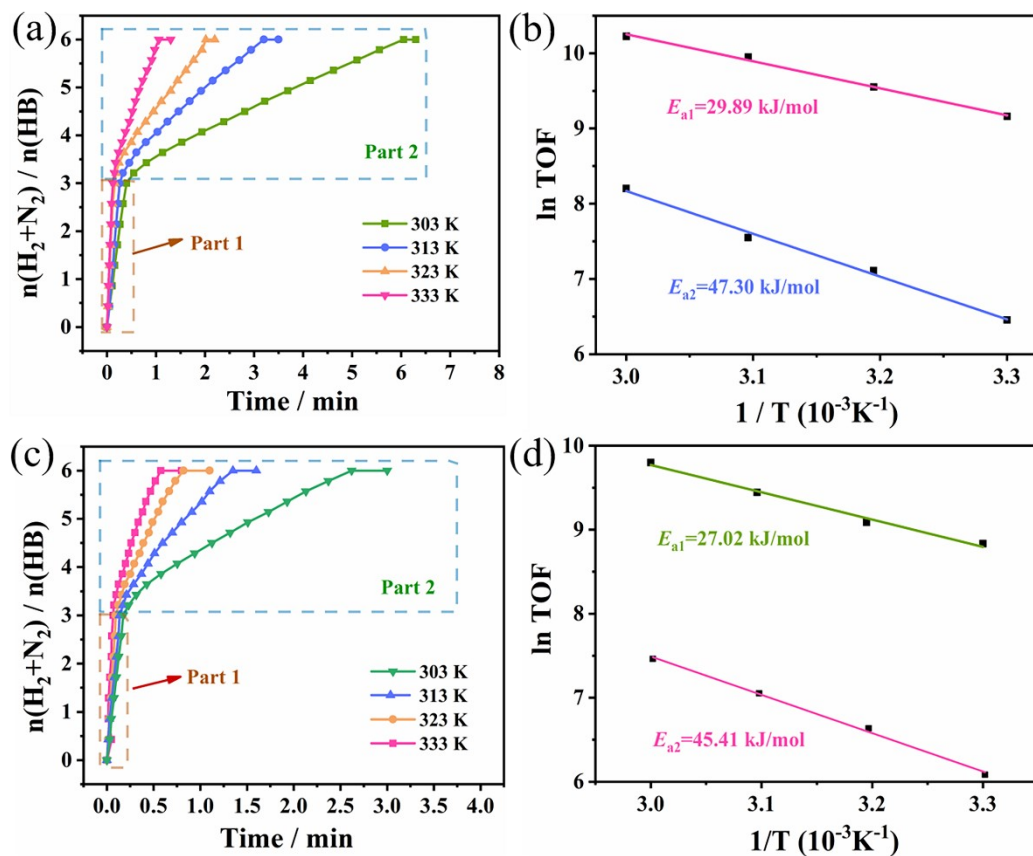

Fig. S11. (a) Time course plots for hydrolytic dehydrogenation of HB aqueous solution (0.5 M, 2.0 mL) by  $\text{Ni}_{0.6}\text{Pt}_{0.4}/\text{P-rGO}$  ( $n_{\text{metal}}=0.05$  mmol) at different temperatures and (b) its related Arrhenius plots ( $\ln \text{TOF}$  versus  $1/T$ ); (c) time course plots for hydrolytic dehydrogenation of HB aqueous solution (0.5 M, 2.0 mL) by  $\text{Ni}_{0.6}\text{Pt}_{0.4}/\text{P-rGO}$  ( $n_{\text{metal}}=0.15$  mmol) at different temperatures and (d) its related Arrhenius plots ( $\ln \text{TOF}$  versus  $1/T$ ).



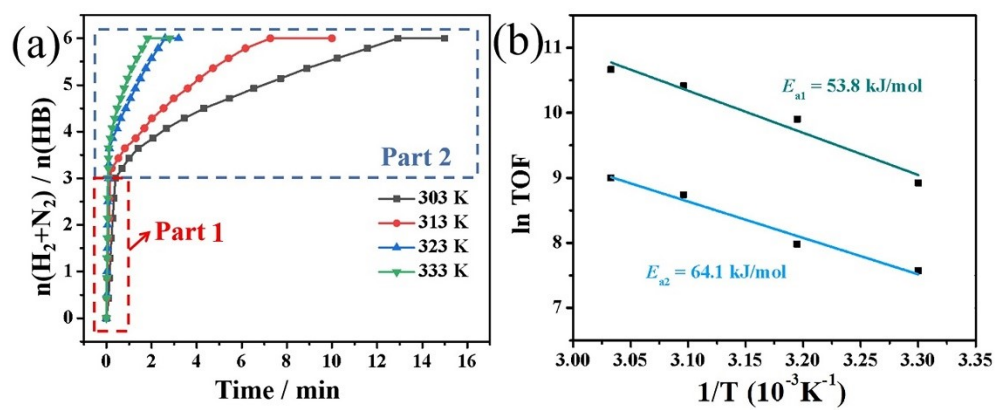

Fig. S12. (a) Time course plots for hydrolytic dehydrogenation of HB aqueous solution (0.5 M, 2.0 mL) by  $\text{Ni}_{0.6}\text{Pt}_{0.4}/\text{rGO}$  at different temperatures and (b) its related Arrhenius plots ( $\ln \text{TOF}$  versus  $1/T$ ).

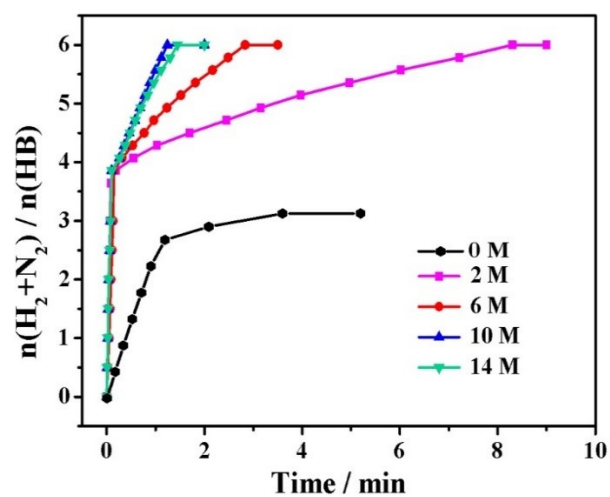

Fig. S13. Time course plots for hydrolytic dehydrogenation of HB aqueous solution (0.5 M, 2.0 mL) with different concentrations of NaOH at 323 K.

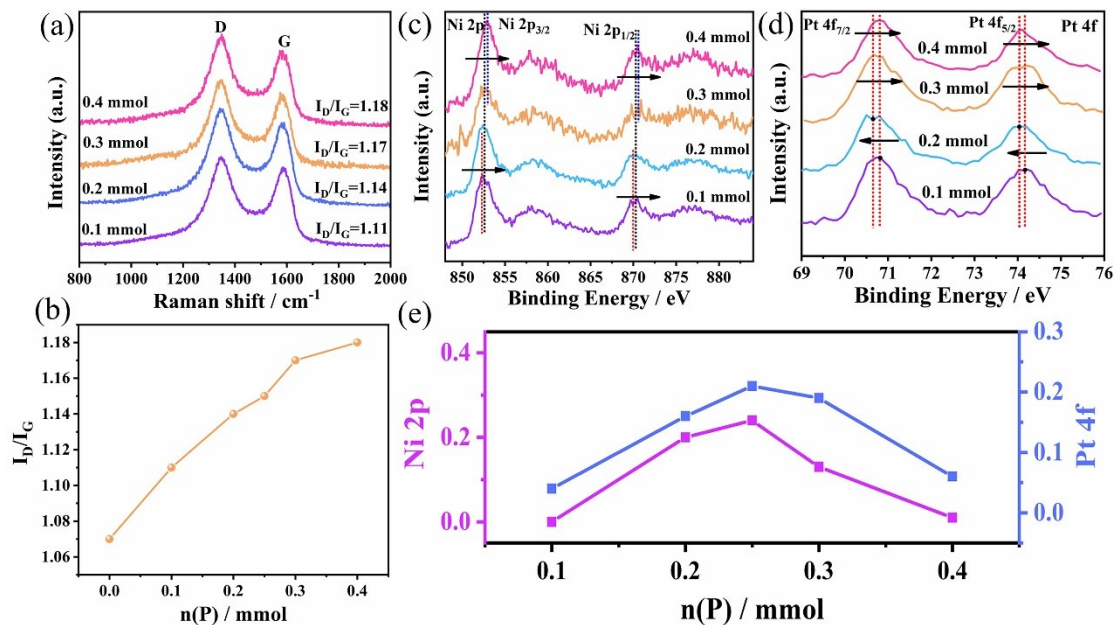

Fig. S14. (a) Raman spectra of  $\text{Ni}_{0.6}\text{Pt}_{0.4}/\text{P-rGO}$  catalysts with different P doping amounts; (b) corresponding curve of  $I_D/I_G$  with change in P doping; high-resolution XPS spectra of (c) Ni 2p and (d) Pt 4f of  $\text{Ni}_{0.6}\text{Pt}_{0.4}/\text{P-rGO}$  catalyst with different P doping quantity; (e) corresponding curves of electron transfer of Ni 2p and Pt 4f as a function of the amount of P doping.

Fig. S14 show the Raman and high resolution XPS spectra of  $\text{Ni}_{0.6}\text{Pt}_{0.4}/\text{P-rGO}$  catalysts with different P amounts. From the Raman spectra of Fig. S14a-b, it can be seen that the number of defects in the catalyst is gradually increasing with the increase of P content. As shown by the high-resolution XPS spectra of Fig. S14c-e, the catalyst has the best electron transfer effect at a P doping amount of 0.25 mmol. In conclusion, the catalyst with better electron transfer effect has better catalytic activity while ensuring the number of catalyst defects.

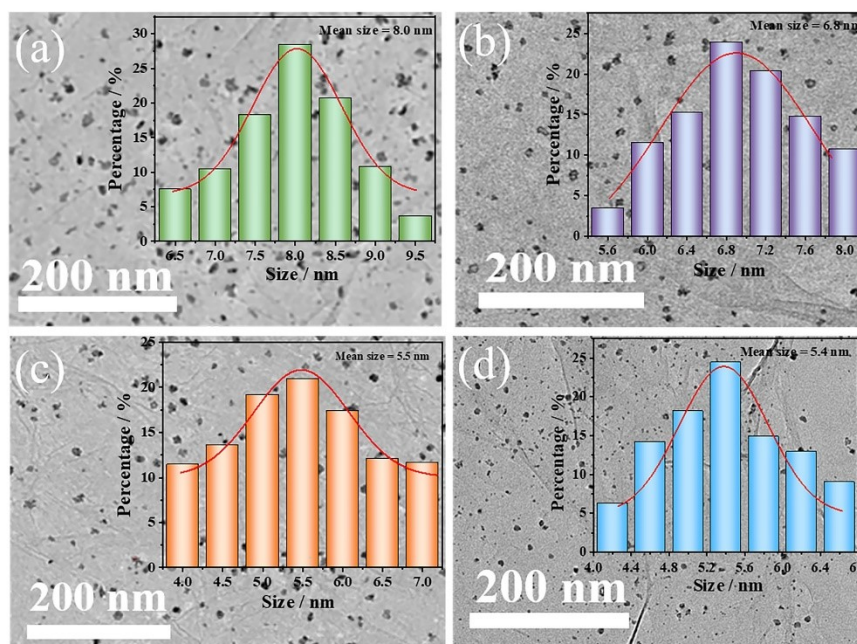

Fig. S15. TEM images of  $\text{Ni}_{0.6}\text{Pt}_{0.4}/\text{P-rGO}$  with P doping amounts of (a) 0.1 mmol, (b) 0.2 mmol, (d) 0.3 mmol and (e) 0.4 mmol, and inset shows the corresponding particle size distribution.

Fig. S15 show the TEM images and particle size distributions of the  $\text{Ni}_{0.6}\text{Pt}_{0.4}/\text{P-rGO}$  catalysts with different P amounts. There is a tendency for the size of  $\text{Ni}_{0.6}\text{Pt}_{0.4}$  NPs to decrease with increasing P content, but the range of nanoparticle size reduction with increasing P content becomes smaller after the P content is greater than 0.25 mmol.

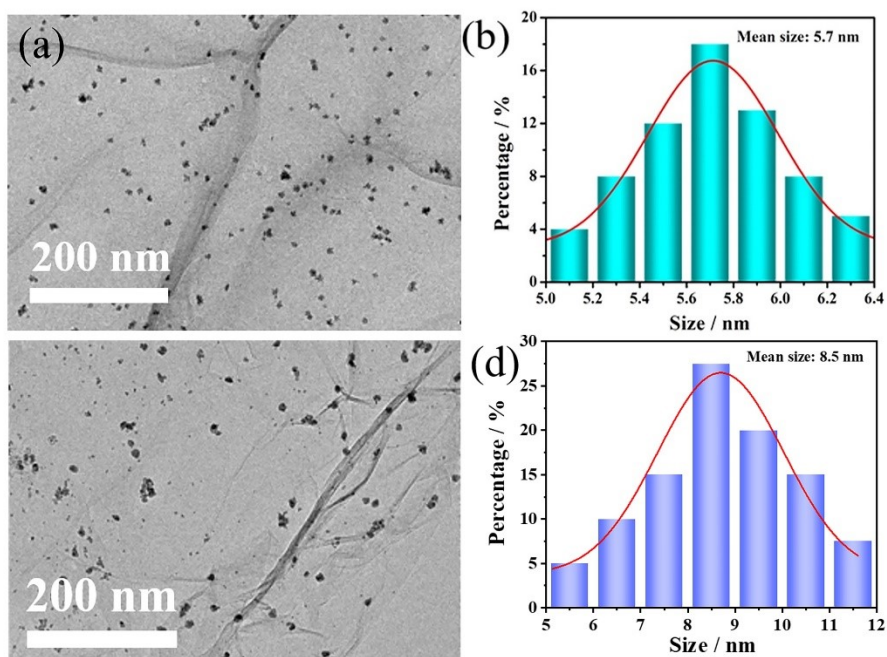

Fig. S16. (a) TEM image and (b) corresponding size distribution of  $\text{Ni}_{0.6}\text{Pt}_{0.4}/\text{P-rGO}$  catalyst after catalyzed HB hydrolytic dehydrogenation; (c) TEM image and (d) corresponding size distribution of  $\text{Ni}_{0.6}\text{Pt}_{0.4}/\text{rGO}$  catalyst after catalyzed HB hydrolytic dehydrogenation.

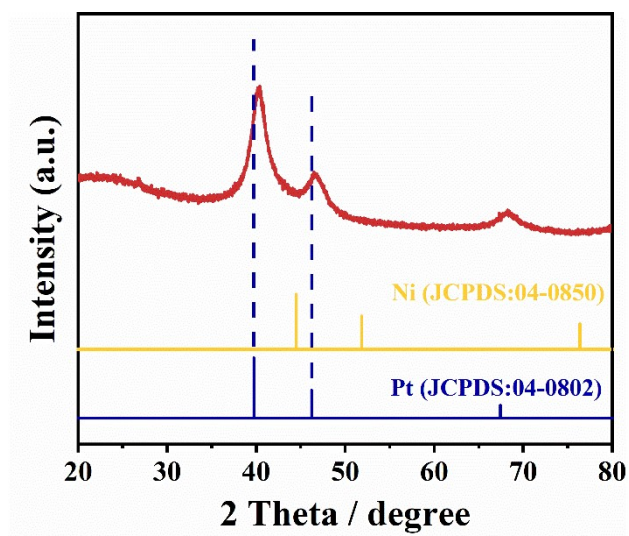

Fig. S17. XRD pattern of the  $\text{Ni}_{0.6}\text{Pt}_{0.4}/\text{P-rGO}$  catalyst after cyclic reaction.

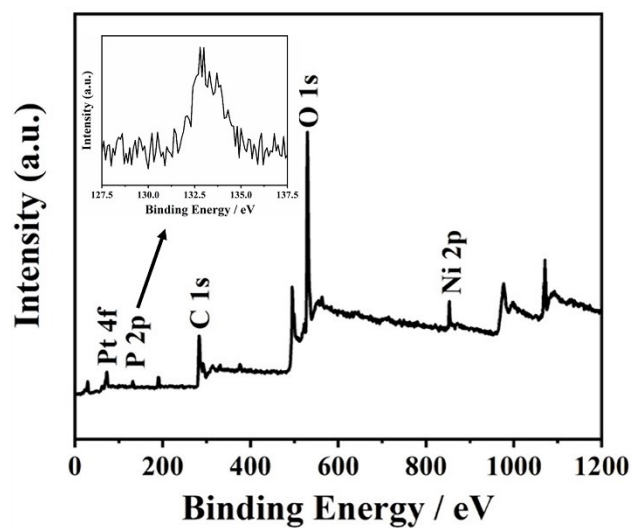

Fig. S18. The survey spectrum of  $\text{Ni}_{0.6}\text{Pt}_{0.4}/\text{P-rGO}$  after catalytic HB hydrolytic dehydrogenation, and inset is corresponding high-resolution XPS spectrum of P 2p.

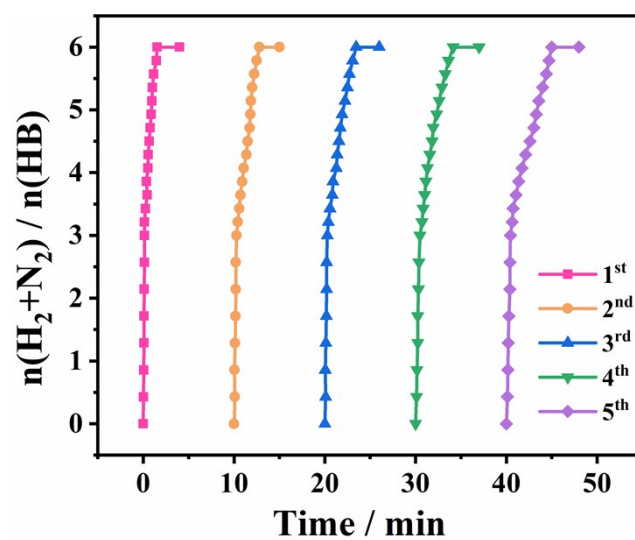

Fig. S19. Recycle stability test for the hydrolytic dehydrogenation of HB aqueous solution (0.5 M, 2.0 mL) by  $\text{Ni}_{0.6}\text{Pt}_{0.4}/\text{P-rGO}$  at 323 K, wherein NaOH is only added in the 1<sup>st</sup> run.



Tab. S1. The compositions of catalyst are determined by ICP-OES.

| <b>Catalyst</b>                            | <b>Ni (mmol)</b> | <b>Pt (mmol)</b> | <b>Ni:Pt<br/>(molar ratio)</b> |
|--------------------------------------------|------------------|------------------|--------------------------------|
| Ni <sub>0.6</sub> Pt <sub>0.4</sub> /P-rGO | 0.044            | 0.026            | 0.63:0.37                      |

Tab. S2. BET specific areas and pore volume of the as-synthesized  $\text{Ni}_{0.6}\text{Pt}_{0.4}/\text{P-rGO}$  and  $\text{Ni}_{0.6}\text{Pt}_{0.4}/\text{rGO}$ .

| <b>Catalysts</b>                              | <b>BET surface area<br/>(<math>\text{m}^2 \text{ g}^{-1}</math>)</b> | <b>Pore volume<br/>(<math>\text{cm}^3 \text{ g}^{-1}</math>)</b> |
|-----------------------------------------------|----------------------------------------------------------------------|------------------------------------------------------------------|
| $\text{Ni}_{0.6}\text{Pt}_{0.4}/\text{P-rGO}$ | 7.28                                                                 | 0.021                                                            |
| $\text{Ni}_{0.6}\text{Pt}_{0.4}/\text{rGO}$   | 5.79                                                                 | 0.019                                                            |

Tab. S3. Comparison of catalytic activity and TOF values of different catalysts for HB dehydrogenation reaction at different temperatures.

| Catalysts                                                                             | Temp.<br>(K) | n (H <sub>2</sub> +N <sub>2</sub> )<br>/n (HB) | TOF<br>(h <sup>-1</sup> ) | Ref.             |
|---------------------------------------------------------------------------------------|--------------|------------------------------------------------|---------------------------|------------------|
| <b>Noble-metal containing catalysts</b>                                               |              |                                                |                           |                  |
| Ni <sub>0.6</sub> Pt <sub>0.4</sub> /P-rGO                                            | 323          | 6.0                                            | 2419.4                    | <b>This work</b> |
| Ni <sub>87.5</sub> Pt <sub>12.5</sub>                                                 | 343          | 5.8                                            | 250                       | [8]              |
| Ni <sub>0.9</sub> Pt <sub>0.1</sub> /MIL-101/rGO                                      | 323          | 6.0                                            | 960                       | [16]             |
| Rh <sub>0.5</sub> (MoO <sub>x</sub> ) <sub>0.5</sub>                                  | 323          | 6.0                                            | 2000                      | [18]             |
| Ni <sub>0.6</sub> Pt <sub>0.4</sub> /La <sub>2</sub> O <sub>2</sub> CO <sub>3</sub>   | 298          | 6.0                                            | 1200                      | [20]             |
| Ni <sub>0.8</sub> Pt <sub>0.2</sub> /DT-Ti <sub>3</sub> C <sub>2</sub> T <sub>x</sub> | 323          | 6.0                                            | 1220                      | [21]             |
| NiPt/Y <sub>2</sub> O <sub>3</sub> /rGO                                               | 323          | 6.0                                            | 3191                      | [23]             |
| Ni <sub>0.6</sub> Pd <sub>0.4</sub> -MoO <sub>x</sub>                                 | 323          | 6.0                                            | 405                       | [24]             |
| Rh <sub>0.8</sub> Ni <sub>0.2</sub> /MIL-101                                          | 323          | 6.0                                            | 1200                      | [25]             |
| Ni <sub>0.75</sub> Ir <sub>0.25</sub> /La <sub>2</sub> O <sub>2</sub> CO <sub>3</sub> | 323          | 6.0                                            | 1250                      | [26]             |
| Ni <sub>0.9</sub> Pt <sub>0.1</sub> -CeO <sub>x</sub> /MIL-101                        | 323          | 6.0                                            | 2951.1                    | [37]             |
| Rh <sub>0.8</sub> Ni <sub>0.2</sub> @CeO <sub>2</sub> /rGO                            | 323          | 6.0                                            | 666.7                     | [43]             |
| Ni <sub>60</sub> Pt <sub>40</sub> /MNC-800                                            | 298          | 6.0                                            | 1111                      | [55]             |
| Ni <sub>0.9</sub> Pt <sub>0.1</sub> -Cr <sub>2</sub> O <sub>3</sub>                   | 323          | 6.0                                            | 1200                      | [56]             |
| Ni <sub>0.22</sub> @Ir <sub>0.78</sub> /OMS-2                                         | 323          | >5.94                                          | 2590                      | [57]             |
| Rh <sub>0.5</sub> Co <sub>0.5</sub> -P/CNTS                                           | 303          | 6.0                                            | 2913                      | [58]             |
| <b>Non-noble metal catalysts</b>                                                      |              |                                                |                           |                  |
| Ni <sub>0.5</sub> Fe <sub>0.5</sub> -CeO <sub>x</sub> /MIL-101                        | 343          | 6.0                                            | 351.3                     | [12]             |
| Cu <sub>0.4</sub> Ni <sub>0.6</sub> Mo                                                | 323          | 6.0                                            | 108                       | [14]             |
| Raney Ni                                                                              | 298          | 6.0                                            | 892                       | [17]             |
| Ni-CeO <sub>2</sub> @SiO <sub>2</sub>                                                 | 343          | 6.0                                            | 442.5                     | [59]             |
| Ni-Cr/CTO-NF                                                                          | 323          | 6.0                                            | 555                       | [60]             |
| Ni-MoO <sub>x</sub> /BN                                                               | 323          | 6.0                                            | 600                       | [61]             |
| Ni-La(OH) <sub>3</sub> /D-MIL-125                                                     | 343          | 6.0                                            | 2381                      | [62]             |
| Ni-Cr(OH) <sub>3</sub> /C-TiO <sub>2</sub>                                            | 323          | 6.0                                            | 577                       | [63]             |

Tab. S4. Comparison of  $E_{a1}$  and  $E_{a2}$  for different catalysts.

| Catalysts                                                                             | $E_{a1}$ | $E_{a2}$ | Ref.             |
|---------------------------------------------------------------------------------------|----------|----------|------------------|
| <b>Noble-metal containing catalysts</b>                                               |          |          |                  |
| Ni <sub>0.6</sub> Pt <sub>0.4</sub> /P-rGO                                            | 28.52    | 46.51    | <b>This work</b> |
| Ni <sub>0.9</sub> Pt <sub>0.1</sub> /MIL-101/rGO                                      | 17.6     | 57.4     | [16]             |
| Rh <sub>0.5</sub> (MoO <sub>x</sub> ) <sub>0.5</sub>                                  | 18.6     | 56.9     | [18]             |
| Ni <sub>0.6</sub> Pt <sub>0.4</sub> /La <sub>2</sub> O <sub>2</sub> CO <sub>3</sub>   | 34.5     | 51.4     | [20]             |
| Ni <sub>0.8</sub> Pt <sub>0.2</sub> /DT-Ti <sub>3</sub> C <sub>2</sub> T <sub>x</sub> | 32.4     | 64.3     | [21]             |
| PtNi@ZIF-8                                                                            | 19.94    | 30.89    | [22]             |
| NiPt/Y <sub>2</sub> O <sub>3</sub> /rGO                                               | 25.6     | 38.9     | [23]             |
| Ni <sub>0.6</sub> Pd <sub>0.4</sub> -MoO <sub>x</sub>                                 | 49.7     | 72.6     | [24]             |
| Rh <sub>0.8</sub> Ni <sub>0.2</sub> /MIL-101                                          | 17.5     | 47.1     | [25]             |
| Ni <sub>0.75</sub> Ir <sub>0.25</sub> /La <sub>2</sub> O <sub>2</sub> CO <sub>3</sub> | 16.3     | 57.7     | [26]             |
| Ni <sub>0.9</sub> Pt <sub>0.1</sub> -CeO <sub>x</sub> /MIL-101                        | 10.5     | 43.9     | [37]             |
| Rh <sub>0.8</sub> Ni <sub>0.2</sub> @CeO <sub>2</sub> /rGO                            | 17.4     | 55.2     | [43]             |
| Ni <sub>60</sub> Pt <sub>40</sub> /MNC-800                                            | 32.2     | 50.9     | [55]             |
| Ni <sub>0.22</sub> @Ir <sub>0.78</sub> /OMS-2                                         | 40.9     | 63.4     | [57]             |
| Rh <sub>0.5</sub> Co <sub>0.5</sub> -P/CNTS                                           | 11.3     | 29.4     | [58]             |
| <b>Non-noble metal catalysts</b>                                                      |          |          |                  |
| Ni <sub>0.5</sub> Fe <sub>0.5</sub> -CeO <sub>x</sub> /MIL-101                        | 33.36    | 45.14    | [12]             |
| Cu <sub>0.4</sub> Ni <sub>0.6</sub> Mo                                                | 19.8     | 54.7     | [14]             |
| Raney Ni                                                                              | 17.05    | 39.47    | [17]             |
| Ni-CeO <sub>2</sub> @SiO <sub>2</sub>                                                 | 22.65    | 58.03    | [59]             |
| Ni-Cr/CTO-NF                                                                          | 21.3     | 54.0     | [60]             |
| Ni-MoO <sub>x</sub> /BN                                                               | 18.96    | 44.15    | [61]             |
| Ni-La(OH) <sub>3</sub> /D-MIL-125                                                     | 20.8     | 36.8     | [62]             |
| Ni-Cr(OH) <sub>3</sub> /C-TiO <sub>2</sub>                                            | 26.4     | 54.8     | [63]             |

## References

- [S1] M. Handayania, B. I. Suwaji, G. I. N. Asih, T. Kusumaningsih, Y. Kusumastuti, Rochmadi and I. Anshori, *Nanocomposites*, 2022, **8**, 74–80.
- [S2] E. K. Walker, D. A. V. Bout and K. J. Stevenson, *Anal. Chem.*, 2012, **84**, 8190–8197.
